# Supplementary material
Source: PubMed Central journal article supplement (PMC6641435)
Supplement: ao8b00079_si_001.pdf [file ao8b00079_si_001.pdf]

## Supporting Information

# Rapid Accessible Fabrication and Engineering of Bilayered Hydrogels: Revisiting the Cross-Linking Effect on Superabsorbent Poly(acrylic acid)

Kyoung Min Lee,<sup>†,‡</sup> Hea Ji Kim,<sup>†</sup> Doyoung Jung,<sup>†</sup> Yuree Oh,<sup>†</sup> Hyemin Lee,<sup>§</sup> Changsun Han,<sup>§</sup> Ji Young Chang,<sup>\*,‡</sup> and Hyungwoo Kim<sup>\*,†</sup>

<sup>†</sup>School of Polymer Science and Engineering, Chonnam National University, Gwangju 61186, Korea

<sup>‡</sup>Department of Materials Science and Engineering, College of Engineering, Seoul National University, Seoul 08826, Korea

<sup>§</sup>Basic Materials and Chemicals R&D, LG Chem, Ltd / R&D Campus Daejeon, 188 Moonji-ro, Yuseong-gu, Daejeon 34122, Korea

\*Corresponding author e-mails: kimhw@jnu.ac.kr; jichang@snu.ac.kr

## Contents

|                                                                     |   |
|---------------------------------------------------------------------|---|
| Effect of Initiator Concentrations on the Mechanical Strength ..... | 2 |
| Measurement of Mechanical Strengths at Various Temperatures .....   | 3 |
| Physical Properties of Bilayered Hydrogels .....                    | 4 |
| References .....                                                    | 8 |
| NMR Spectra .....                                                   | 9 |

## Effect of Initiator Concentrations on the Mechanical Strength

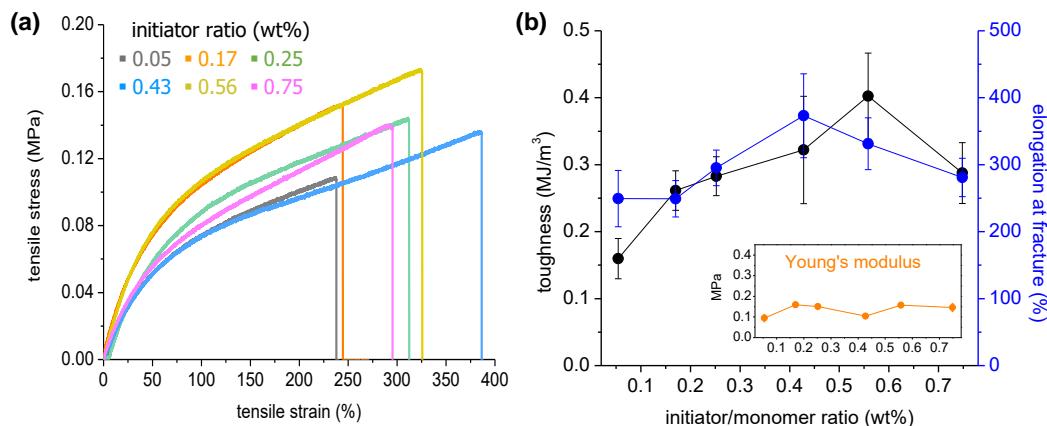

**Figure S1.** Mechanical properties of hydrogels obtained with different amounts of KPS. (a) Representative tensile stress–strain curves from hydrogels that contain different concentrations of initiator with 0.34 wt% cross-linker. (b) Change in toughness (black) and elongation at fracture (blue) of the hydrogels with respect to the concentration of initiator. Young’s modulus (red) was almost maintained as shown in the inset in b. The data points were obtained in quintuplicate from five independent experiments.

**Table S1.** Average Young’s modulus, elongation at fracture, and toughness that correspond to Figure S1b, and 5c.

| initiator (wt%) | Young’s modulus (MPa) |      | elongation at fracture (%) |      | toughness (MJ/m <sup>3</sup> ) |      |
|-----------------|-----------------------|------|----------------------------|------|--------------------------------|------|
|                 | Avg.                  | Std. | Avg.                       | Std. | Avg.                           | Std. |
| 0.05            | 0.09                  | 0.02 | 249.4                      | 42.1 | 0.16                           | 0.03 |
| 0.17            | 0.16                  | 0.01 | 249.1                      | 27.2 | 0.26                           | 0.03 |
| 0.25            | 0.15                  | 0.01 | 295.2                      | 26.5 | 0.28                           | 0.03 |
| 0.43            | 0.10                  | 0.01 | 373.1                      | 62.6 | 0.32                           | 0.08 |
| 0.56            | 0.16                  | 0.01 | 331.3                      | 38.8 | 0.40                           | 0.06 |
| 0.75            | 0.15                  | 0.02 | 280.9                      | 28.6 | 0.29                           | 0.05 |

**Table S2.** Average Young’s modulus, elongation at fracture, and toughness that correspond to Figure 4b.

| hydrogel film | cross-linker (wt%) | Young’s modulus (MPa) |      | elongation at fracture (%) |      | toughness (MJ/m <sup>3</sup> ) |      |
|---------------|--------------------|-----------------------|------|----------------------------|------|--------------------------------|------|
|               |                    | Avg.                  | Std. | Avg.                       | Std. | Avg.                           | Std. |
| 1             | 0.20               | 0.12                  | 0.01 | 219.8                      | 40.2 | 0.17                           | 0.04 |
| 2             | 0.34               | 0.15                  | 0.01 | 295.2                      | 26.9 | 0.28                           | 0.03 |
| 3             | 0.42               | 0.12                  | 0.01 | 303.4                      | 24.4 | 0.27                           | 0.03 |
| 4             | 0.50               | 0.15                  | 0.01 | 244.6                      | 36.7 | 0.25                           | 0.04 |
| 5             | 0.63               | 0.12                  | 0.01 | 192.0                      | 14.1 | 0.14                           | 0.02 |
| 6             | 0.80               | 0.11                  | 0.01 | 92.5                       | 14.5 | 0.04                           | 0.02 |

## Measurement of Mechanical Strengths at Various Temperatures

To test mechanical properties of hydrogel films at high temperature, we used universal testing machine with temperature controlled chamber. Specimens were prepared in way that previously mentioned. Sample specimens were stretched on temperature controlled chamber (40 °C, 60 °C, and 80 °C) until the samples were broken. Furthermore, specimens were left in the chamber and heated for certain time (0 min, 3min, and 10min). Photographs of universal tensile machine when heating to 80 °C is shown in Figure S2a.

**Table S3.** Average Young's modulus, elongation at fracture, and toughness that correspond to Figure 5a–5c.

| hydrogel film | cross-linker (wt%) | Temp. | Young's modulus (MPa) |      | elongation at fracture (%) |      | toughness (MJ/m <sup>3</sup> ) |      |
|---------------|--------------------|-------|-----------------------|------|----------------------------|------|--------------------------------|------|
|               |                    |       | Avg.                  | Std. | Avg.                       | Std. | Avg.                           | Std. |
| 1             | 0.20               | 25 °C | 0.12                  | 0.01 | 221.2                      | 36.0 | 0.17                           | 0.04 |
| 3             | 0.42               |       | 0.12                  | 0.01 | 304.0                      | 22.6 | 0.27                           | 0.03 |
| 6             | 0.81               |       | 0.11                  | 0.01 | 92.2                       | 12.7 | 0.04                           | 0.02 |
| 1             | 0.20               | 80 °C | 0.28                  | 0.05 | 158.9                      | 34.0 | 0.63                           | 0.11 |
| 3             | 0.42               |       | 0.27                  | 0.06 | 153.5                      | 35.7 | 0.29                           | 0.10 |
| 6             | 0.81               |       | 0.51                  | 0.07 | 114.6                      | 23.5 | 0.35                           | 0.08 |

**Table S4.** Average Young's modulus (MPa) of **3** measured at 40 °C, 60 °C, and 80 °C, corresponding to Figure 5d.

| exposure time (min) | 40 °C |      | 60 °C |      | 80 °C |      |
|---------------------|-------|------|-------|------|-------|------|
|                     | Avg.  | Std. | Avg.  | Std. | Avg.  | Std. |
| 0                   | 0.15  | 0.01 | 0.15  | 0.01 | 0.15  | 0.01 |
| 3                   | 0.20  | 0.03 | 0.28  | 0.06 | 0.39  | 0.13 |
| 10                  | 0.35  | 0.20 | 0.44  | 0.21 | 0.49  | 0.11 |

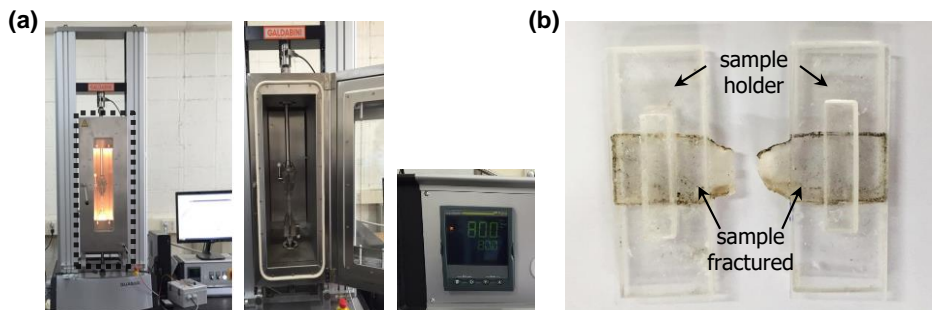

**Figure S2.** (a) Photographs of universal tensile machine when heating to 80 °C. (b) Photograph of the hydrogel film **3** containing 0.42 wt% cross-linker after fractured at 80 °C. Edges were slightly blackened while cutting the pristine film by a laser cutter, which did not affect the tensile strength.

## Physical Properties of Bilayered Hydrogels

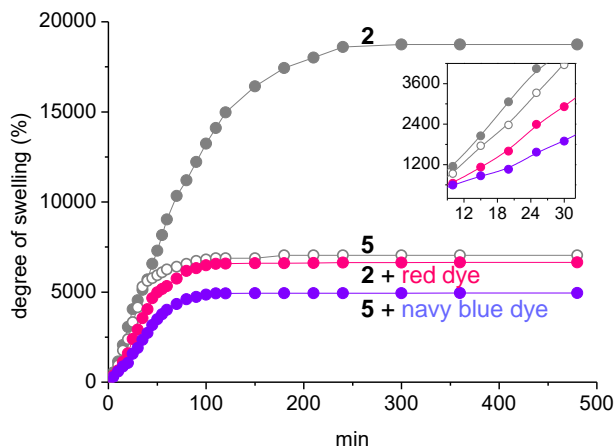

**Figure S3.** Change in degree of swelling of control layers (red **2** and navy blue **5**). Swelling behaviors of pristine **2** and **5** are shown for comparison. The rate of swelling for red **2** is  $114\% \text{ min}^{-1}$  and navy blue **5**,  $65\% \text{ min}^{-1}$  calculated from the initial linear region shown in the inset.

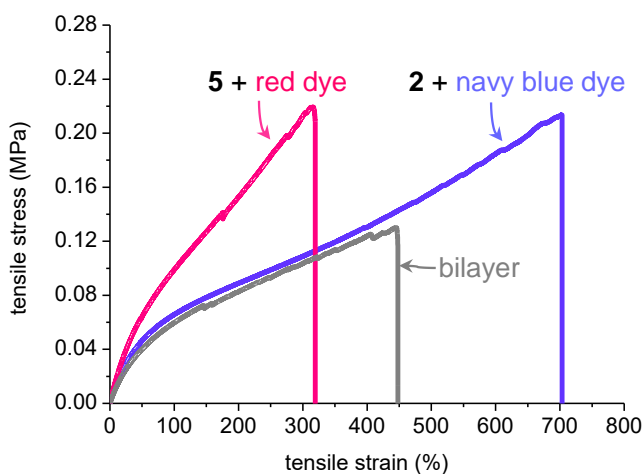

**Figure S4.** Representative tensile stress–strain curves measured from navy blue **2**, red **5**, and the resulting bilayer.

**Table S5.** Average Young's modulus, elongation at fracture, and toughness that correspond to Figure 6c.

| hydrogel film      | Young's modulus (MPa) |      | elongation at fracture (%) |      | toughness (MJ/m <sup>3</sup> ) |      |
|--------------------|-----------------------|------|----------------------------|------|--------------------------------|------|
|                    | Avg.                  | Std. | Avg.                       | Std. | Avg.                           | Std. |
| <b>2</b>           | 0.15                  | 0.01 | 295.2                      | 26.9 | 0.28                           | 0.03 |
| <b>5</b>           | 0.12                  | 0.01 | 192.0                      | 14.1 | 0.14                           | 0.02 |
| navy blue <b>2</b> | 0.09                  | 0.01 | 688.0                      | 46.5 | 0.79                           | 0.06 |
| red <b>5</b>       | 0.14                  | 0.01 | 334.0                      | 23.0 | 0.43                           | 0.04 |
| bilayer            | 0.09                  | 0.00 | 451.9                      | 31.1 | 0.39                           | 0.04 |

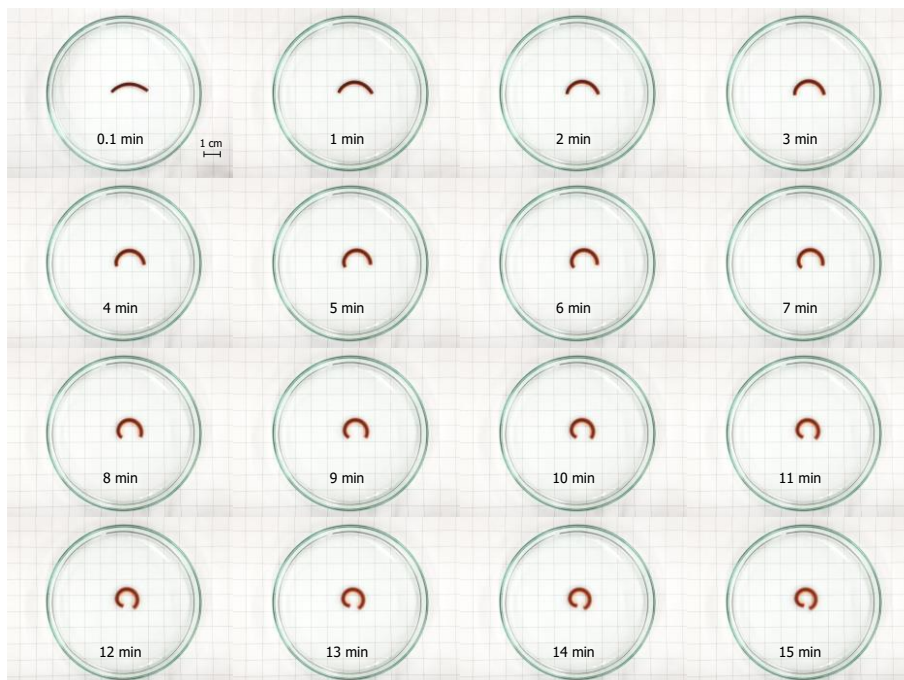

**Figure S5.** Time-lapsed photographs of the bending of the hydrogel bilayer (length, 2.8 cm; width, 0.3 cm; thickness, 2 mm) in a pH 7 buffer solution at 25 °C, taken every minute. The bilayer was curled into a round within 15 min.

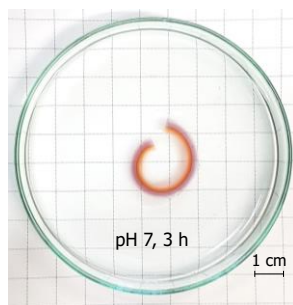

**Figure S6.** Photograph of the hydrogel bilayer (length, 2.8 cm; width, 0.3 cm; thickness, 2 mm) taken after exposure to a pH 7 buffer solution at 25 °C for 3 h.

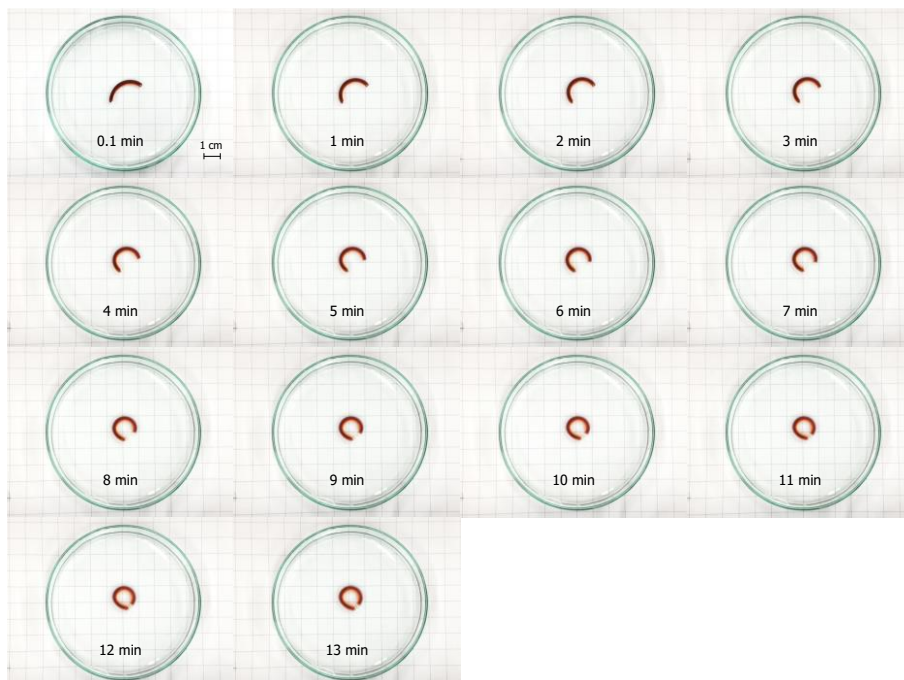

**Figure S7.** Time-lapsed photographs of the bending of the hydrogel bilayer (length, 2.8 cm; width, 0.3 cm; thickness, 2 mm) in a pH 3 buffer solution at 25 °C, taken every minute. The bilayer was curled into a round within 13 min.

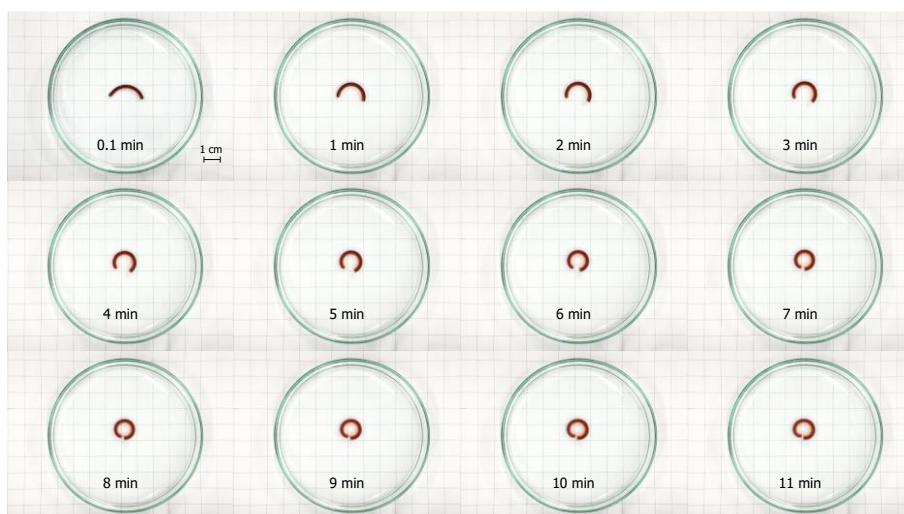

**Figure S8.** Time-lapsed photographs of the bending of the hydrogel bilayer (length, 2.8 cm; width, 0.3 cm; thickness, 2 mm) in a pH 10 buffer solution at 25 °C, taken every minute. The bilayer was curled into a round within 11 min.

**Table S6.** Change in curvature of bilayered hydrogel in pH 3, 7, and 10 as time elapsed corresponding to Figure 6e.

| time (min) | curvature (m <sup>-1</sup> ) |      |       |
|------------|------------------------------|------|-------|
|            | pH 3                         | pH 7 | pH 10 |
| 0.1        | 82                           | 66   | 105   |
| 1          | 110                          | 98   | 142   |
| 2          | 136                          | 117  | 169   |
| 3          | 144                          | 129  | 183   |
| 4          | 161                          | 137  | 196   |
| 5          | 168                          | 148  | 200   |
| 6          | 172                          | 157  | 209   |
| 7          | 183                          | 164  | 216   |
| 8          | 189                          | 174  | 225   |
| 9          | 190                          | 182  | 224   |
| 10         | 191                          | 187  | 224   |
| 11         | 193                          | 195  | 224   |
| 12         | 190                          | 199  |       |
| 13         | 190                          | 204  |       |
| 14         |                              | 208  |       |
| 15         |                              | 208  |       |

**Table S7.** Change in degree of swelling of hydrogels **2**, navy blue **2**, red **2**, **5**, navy blue **5**, and red **5** in DI water as time elapsed corresponding to Figure 6b and Figure S3.

| time (min) | <b>2</b> | navy blue <b>2</b> | red <b>2</b> | <b>5</b> | navy blue <b>5</b> | red <b>5</b> |
|------------|----------|--------------------|--------------|----------|--------------------|--------------|
| 0          | 0        | 0                  | 0            | 0        | 0                  | 0            |
| 5          | 530      | 341                | 360          | 360      | 279                | 246          |
| 10         | 1146     | 784                | 646          | 932      | 592                | 566          |
| 15         | 2052     | 1479               | 1122         | 1757     | 866                | 1137         |
| 20         | 3059     | 2570               | 1598         | 2376     | 1062               | 1440         |
| 25         | 4045     | 3442               | 2392         | 3329     | 1571               | 2013         |
| 30         | 4538     | 4342               | 2916         | 4154     | 1897               | 2413         |
| 35         | 5117     | 5362               | 3551         | 5297     | 2341               | 2823         |
| 40         | 5697     | 5965               | 4043         | 5614     | 2733               | 3053         |
| 45         | 6567     | 6544               | 4662         | 5773     | 3164               | 3233         |
| 50         | 7291     | 7100               | 4979         | 5932     | 3490               | 3316         |
| 55         | 8161     | 7472               | 5170         | 6090     | 3764               | 3336         |
| 60         | 9030     | 7822               | 5329         | 6249     | 4012               | 3373         |
| 70         | 10335    | 8203               | 5741         | 6408     | 4339               | 3438         |
| 80         | 11204    | 8533               | 6170         | 6567     | 4600               | 3448         |
| 90         | 12219    | 8771               | 6329         | 6725     | 4730               | 3516         |
| 100        | 13233    | 8842               | 6487         | 6805     | 4861               | 3518         |
| 110        | 14103    | 8850               | 6567         | 6884     | 4926               | 3536         |
| 120        | 14972    | 8900               | 6583         | 6884     | 4926               | 3556         |
| 150        | 16422    | 8933               | 6598         | 6884     | 4939               | 3695         |
| 180        | 17436    | 9000               | 6598         | 7043     | 4939               | 3700         |
| 210        | 18016    | 9017               | 6614         | 7043     | 4939               | 3718         |
| 240        | 18596    | 9033               | 6630         | 7043     | 4939               | 3755         |
| 300        | 18741    | 9033               | 6630         | 7043     | 4939               | 3791         |
| 360        | 18741    | 9067               | 6646         | 7043     | 4952               | 3791         |
| 480        | 18741    | 9183               | 6646         | 7043     | 4952               | 3809         |

## References

1. Ma, J.; Lee, J.; Han, S. S.; Oh, K. H.; Nam, K. T.; Sun, J. Y. Highly Stretchable and Notch-Insensitive Hydrogel Based on Polyacrylamide and Milk Protein. *ACS Appl. Mater. Interfaces*. **2016**, *8*, 29220–29226.



# NMR Spectra

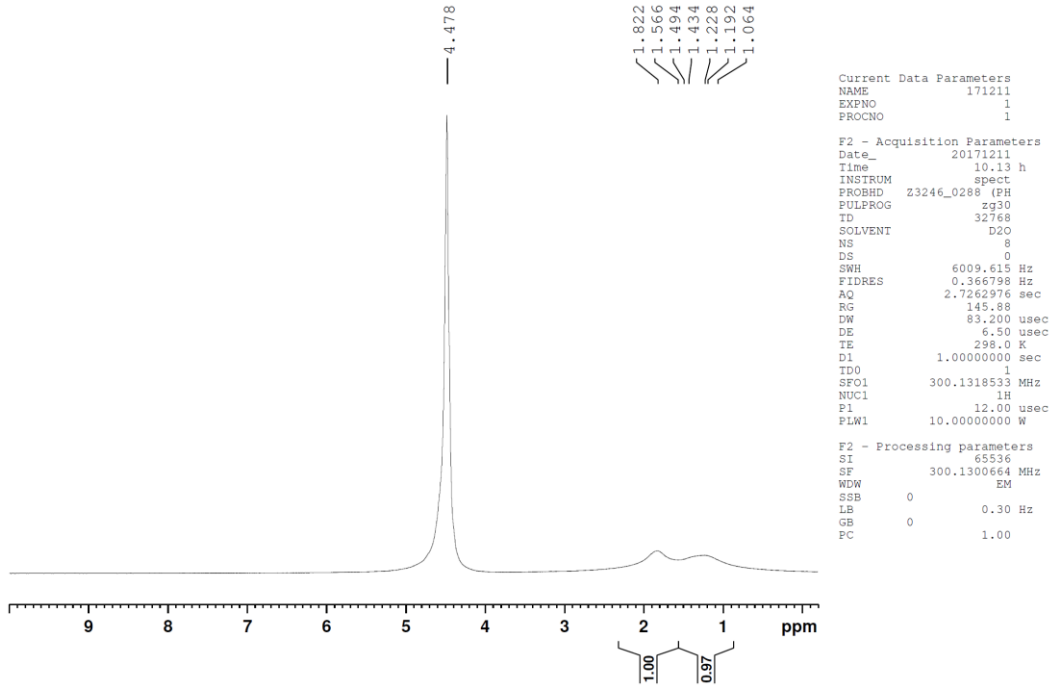

Figure S9. <sup>1</sup>H NMR spectrum of **2**.

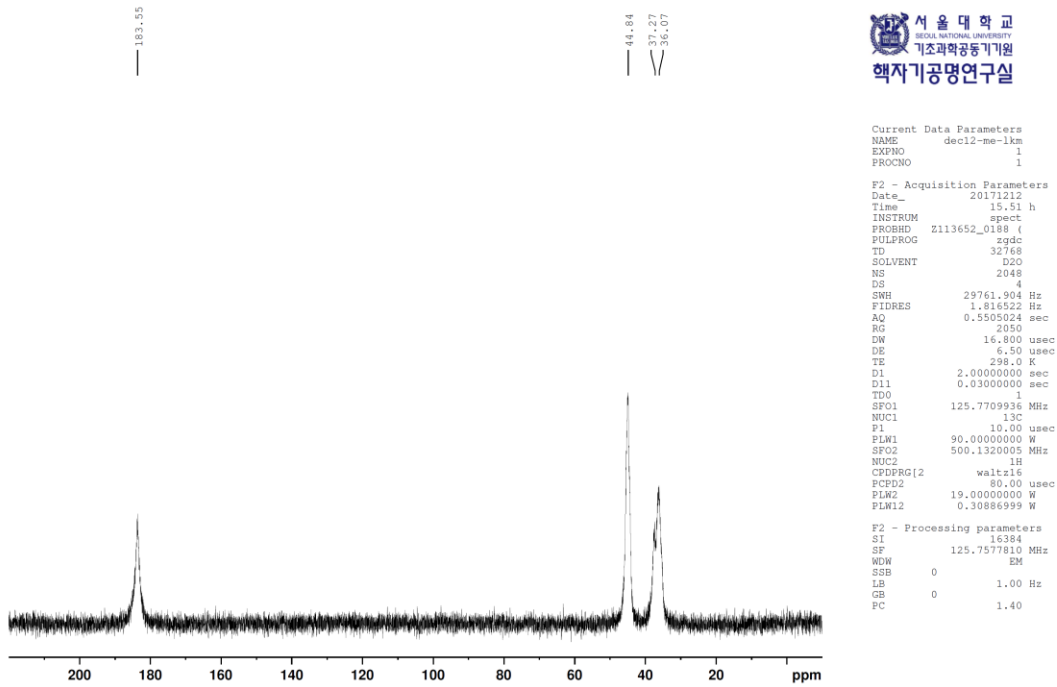

Figure S10. <sup>13</sup>C NMR spectrum of **2**.
